# Supplementary material for: ABCG2 impairs the activity of the aurora kinase inhibitor tozasertib but not of alisertib
Source: Springer Nature journal article supplement (doi:10.1186/s13104-015-1405-4), 2015-09-28
Supplement: MOESM1 [file 13104_2015_1405_MOESM1_ESM.pdf]

**Suppl. Table 1.** Effects of tozasertib, alisertib, and the cytotoxic ABCG2 substrate mitoxantrone on the viability of non-ABCG2-expressing UKF-NB-3 cells, UKF-NB-3 cells transduced with a lentiviral vector encoding for ABCG2 (UKF-NB-3<sup>ABCG2</sup>), or UKF-NB-3 cells transduced with a control vector (UKF-NB-3<sup>piG2</sup>) in the absence or presence of the ABCG2 inhibitor WK-X-34 as determined by MTT assay after 120h of incubation.

|                           | IC <sub>50</sub> <sup>1</sup> tozasertib (nM)      | + WK-X-34 (2.5μM)          |                                |
|---------------------------|----------------------------------------------------|----------------------------|--------------------------------|
|                           |                                                    | WK-X-34 alone <sup>2</sup> |                                |
| UKF-NB-3                  | 5.50 ± 0.22                                        | 97 ± 2                     | 5.52 ± 0.34 (1.0) <sup>3</sup> |
| UKF-NB-3 <sup>ABCG2</sup> | 319.7 ± 49.6                                       | 95 ± 3                     | 6.55 ± 0.64 (48.8)             |
| UKF-NB-3 <sup>piG2</sup>  | 5.31 ± 0.82                                        | 96 ± 2                     | 6.12 ± 0.69 (0.9)              |
|                           |                                                    |                            |                                |
|                           | IC <sub>50</sub> <sup>1</sup> alisertib (nM)       | + WK-X-34 (2.5μM)          |                                |
|                           |                                                    | WK-X-34 alone <sup>2</sup> |                                |
| UKF-NB-3                  | 2.94 ± 0.43                                        | 97 ± 2                     | 3.49 ± 0.29 (0.8) <sup>3</sup> |
| UKF-NB-3 <sup>ABCG2</sup> | 3.13 ± 0.21                                        | 95 ± 3                     | 3.94 ± 0.35 (0.8)              |
| UKF-NB-3 <sup>piG2</sup>  | 2.86 ± 0.46                                        | 96 ± 2                     | 3.50 ± 0.61 (0.8)              |
|                           |                                                    |                            |                                |
|                           | IC <sub>50</sub> <sup>1</sup> mitoxantrone (ng/mL) | + WK-X-34 (2.5μM)          |                                |
|                           |                                                    | WK-X-34 alone <sup>2</sup> |                                |
| UKF-NB-3                  | 0.15 ± 0.09                                        | 97 ± 2                     | 0.18 ± 0.05 (0.8) <sup>3</sup> |
| UKF-NB-3 <sup>ABCG2</sup> | 68.2 ± 8.2                                         | 95 ± 3                     | 0.23 ± 0.07 (296.5)            |
| UKF-NB-3 <sup>piG2</sup>  | 0.16 ± 0.04                                        | 96 ± 2                     | 0.14 ± 0.04 (1.1)              |

<sup>1</sup> concentration that reduces cell viability by 50% relative to non-treated control

<sup>2</sup> cell viability (%) relative to non-treated control

<sup>3</sup> fold change IC<sub>50</sub>/ IC<sub>50</sub> in the presence of WK-X-34
